# Supplementary material for: Coding regions affect mRNA stability in human cells
Source: PubMed Central journal article supplement (PMC6859850; doi:10.1261/rna.073239.119), 2019-12
Supplement: supp_073239.119_Supplemental_Figure_2.pdf [file supp_073239.119_Supplemental_Figure_2.pdf]

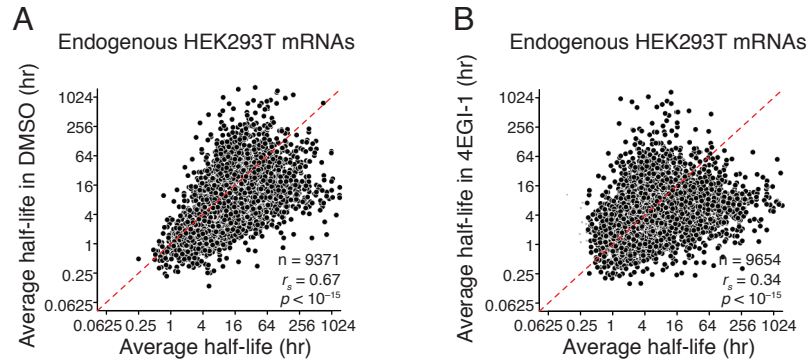

**Figure S2. The effect of 4EGI-1 on mRNA stability.** (A) DMSO treatment does not substantially affect mRNA stability. Shown are scatterplots comparing half-lives for endogenous genes (averaged from both pools) from the original experiment and DMSO-treated cells. Red dashed line represents  $x = y$ . (B) 4EGI-1 treatment affects mRNA stability. As in A, except comparing half-lives from the original experiment and 4EGI-1-treated cells.
