# Supplementary material for: Coding regions affect mRNA stability in human cells
Source: PubMed Central journal article supplement (PMC6859850; doi:10.1261/rna.073239.119), 2019-12

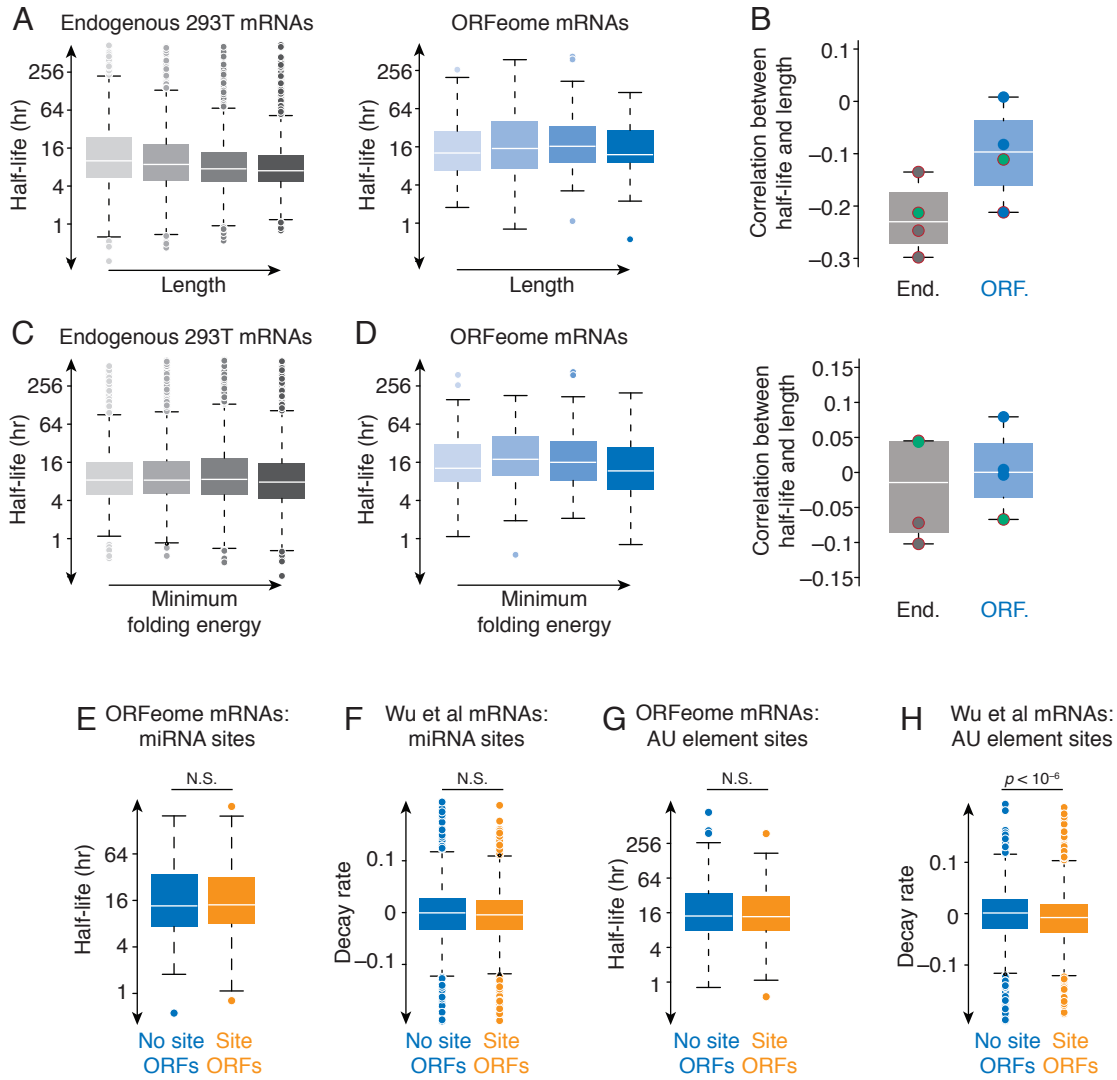

Supplement: supp_073239.119_Supplemental_Figure_3.pdf [file supp_073239.119_Supplemental_Figure_3.pdf]
